# Supplementary material for: A free-standing LiFePO4–carbon paper hybrid cathode for flexible lithium-ion batteries
Source: Royal Society of Chemistry journal article supplement (doi:10.1039/c5gc02602d), 2016-01-01
Supplement: c5gc02602d1.pdf [file c5gc02602d1.pdf]

## Electronic Supplementary Information

### Free-standing LiFePO<sub>4</sub>-carbon paper hybrid cathode for flexible Lithium-ion batteries

Katja Kretschmer, Bing Sun\*, Xiuqiang Xie, Shuangqiang Chen and Guoxiu Wang\*

Centre for Clean Energy Technology, School of Mathematics and Physical Sciences, University of Technology Sydney, Sydney NSW 2007, Australia.

[Bing.sun@uts.edu.au](mailto:Bing.sun@uts.edu.au) , [Guoxiu.Wang@uts.edu.au](mailto:Guoxiu.Wang@uts.edu.au)

Table 1: GEM Commodity prices of wood pulp and aluminium from 2010 to 2014.<sup>[1]</sup>

|                       | 2010    | 2011    | 2012    | 2013    | 2014    |
|-----------------------|---------|---------|---------|---------|---------|
| Wood pulp<br>[US\$/t] | 866.79  | 899.65  | 762.84  | 823.08  | 876.91  |
| Aluminium<br>[US\$/t] | 2173.12 | 2401.39 | 2023.28 | 1846.67 | 1867.42 |

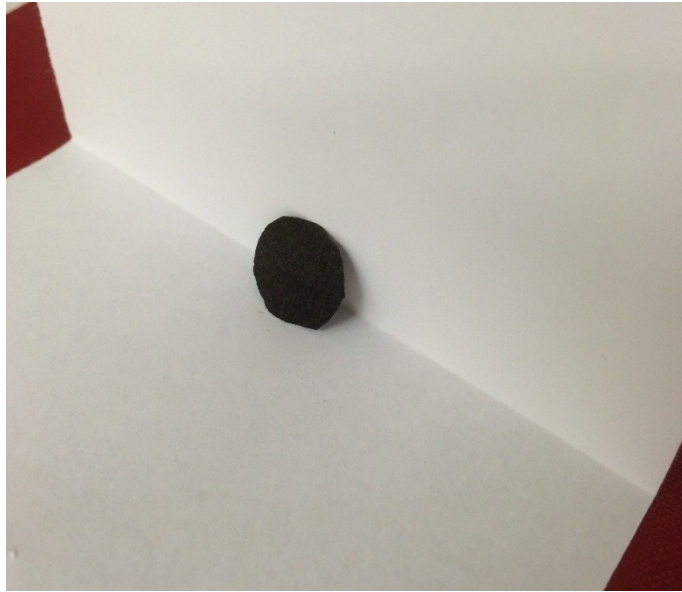

Figure S1: Digital photograph of the free-standing  $\text{LiFePO}_4@CP$  hybrid electrode.

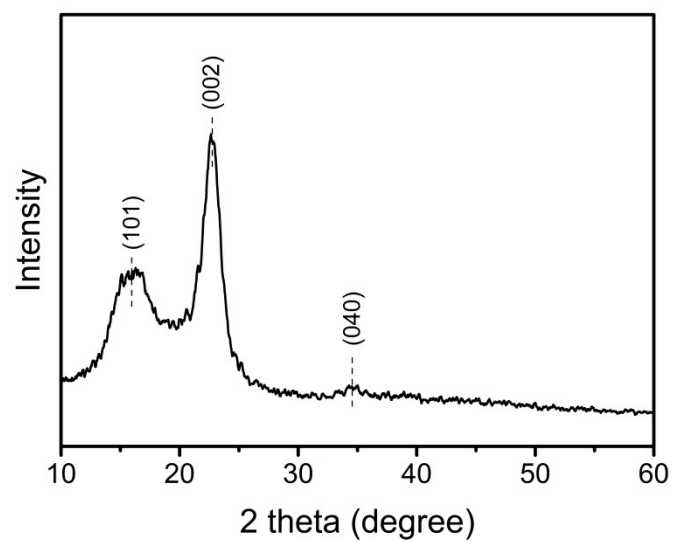

Figure S2: Measured XRD pattern of purified paper towel matching the standard XRD pattern of microcrystalline cellulose.<sup>[2-3]</sup>

*Electrode preparation process:* For the impregnation with solution 1 (STEP 1 in Scheme 1 main article) consisting of the phosphate and lithium precursor salts, it is important to understand the precipitation mechanism of LiOH·H<sub>2</sub>O and NH<sub>4</sub>H<sub>2</sub>PO<sub>4</sub> and the subsequent acid-assisted dissolution of Li<sub>3</sub>PO<sub>4</sub>. This allows validating the weight gain as an accurate marker to calculate the amount of solution 2, which contains the iron and carbon precursors, needed to generate the correct stoichiometric ratio of LiFePO<sub>4</sub> impregnated into the PT network. The first reaction between the two precursor materials is the precipitation of Li<sub>3</sub>PO<sub>4</sub>, wherein all Li ions are consumed (1). The residual NH<sub>4</sub>H<sub>2</sub>PO<sub>4</sub> dissolves to form aqueous phosphoric acid (H<sub>3</sub>PO<sub>4</sub>) and NH<sub>3</sub> (2). Hydrochloric acid (HCl) then dissolves the Li<sub>3</sub>PO<sub>4</sub> precipitate to form LiCl and LiH<sub>2</sub>PO<sub>4</sub> (3), wherein LiCl is consumed by H<sub>3</sub>PO<sub>4</sub> to form crystalline LiH<sub>2</sub>PO<sub>4</sub> upon solvent and HCl evaporation (4).<sup>[4]</sup> Consequently, the freeze-drying process leaves the PT impregnated with highly crystalline LiH<sub>2</sub>PO<sub>4</sub> homogeneously dispersed throughout the fibre network.

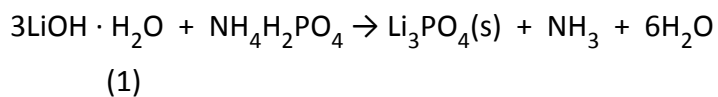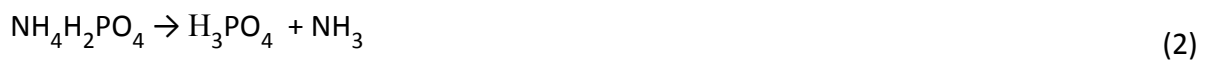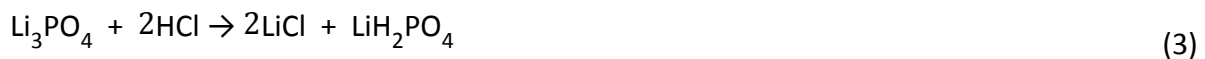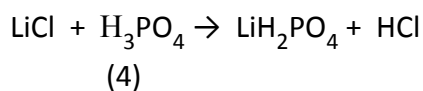

The reaction mechanism in solution 1 as described in equation (1) to (4) has been confirmed by the XRD pattern of the dried solution (Figure S3). The traces of LiCl are negligible due to the pure phase XRD pattern of the final product (Figure 1 main article). It can be assumed that this minor Li excess does not result in the formation of impurities, such as Li<sub>3</sub>PO<sub>4</sub>.<sup>[5-6]</sup> On the contrary, a slight oversupply of lithium during solid-state preparation methods is considered beneficial to compensate for the loss of the lithium element caused by the evaporation of Li<sub>2</sub>O.<sup>[7]</sup> These residual LiCl crystals are possibly caused by an undersupply of phosphoric acid (H<sub>3</sub>PO<sub>4</sub>). According to the theoretical assumption of the reaction mechanism during freeze-drying of solution 1, the mass of the Fe(III)Cl<sub>3</sub> solution (solution 2) needed to ensure the appropriate molar ratio Li:Fe:PO<sub>4</sub>=1:1:1 can be sufficiently calculated from the mass load of PT. The impregnation of the iron precursor (STEP 2 in Scheme 1 main article) includes the dissolved carbon precursor, which is applied as reducing agent and to generate a conductive carbon coating on the surface of the LiFePO<sub>4</sub> layer, which also serves as structural support. The next stage of the electrode preparation is the two-stage heat treatment (STEP 3 in Scheme 1 main article). The first heat treatment stage at 312 °C was chosen to allow Fe(III)Cl<sub>3</sub> to melt and consequently enable capillary forces to homogeneously distribute it through the PT fibre network. The decomposition of all precursor materials, the

crystal formation of  $\text{LiFePO}_4$ , and the carbon network generation takes simultaneously place in the second and final heat treatment stage from 312 °C to 700 °C.

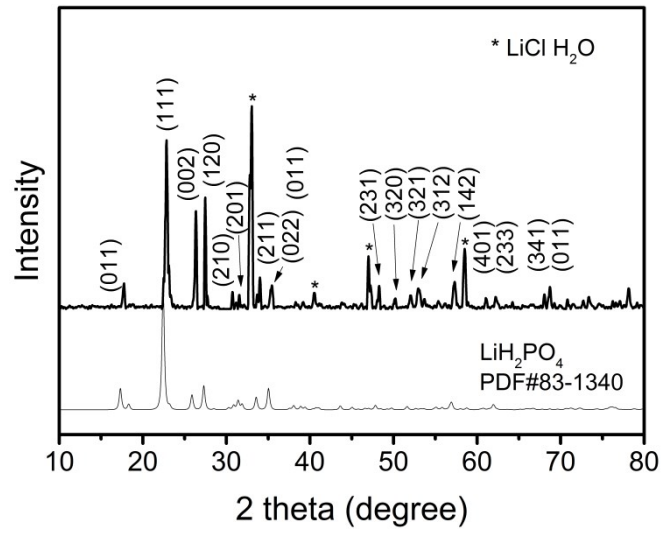

Figure S3: XRD pattern of solution 1 after drying compared with the simulated pattern of  $\text{LiH}_2\text{PO}_4$  calculated from JCPDS card number 83-1340 (\* marks traces for  $\text{LiCl}\cdot\text{H}_2\text{O}$ ).

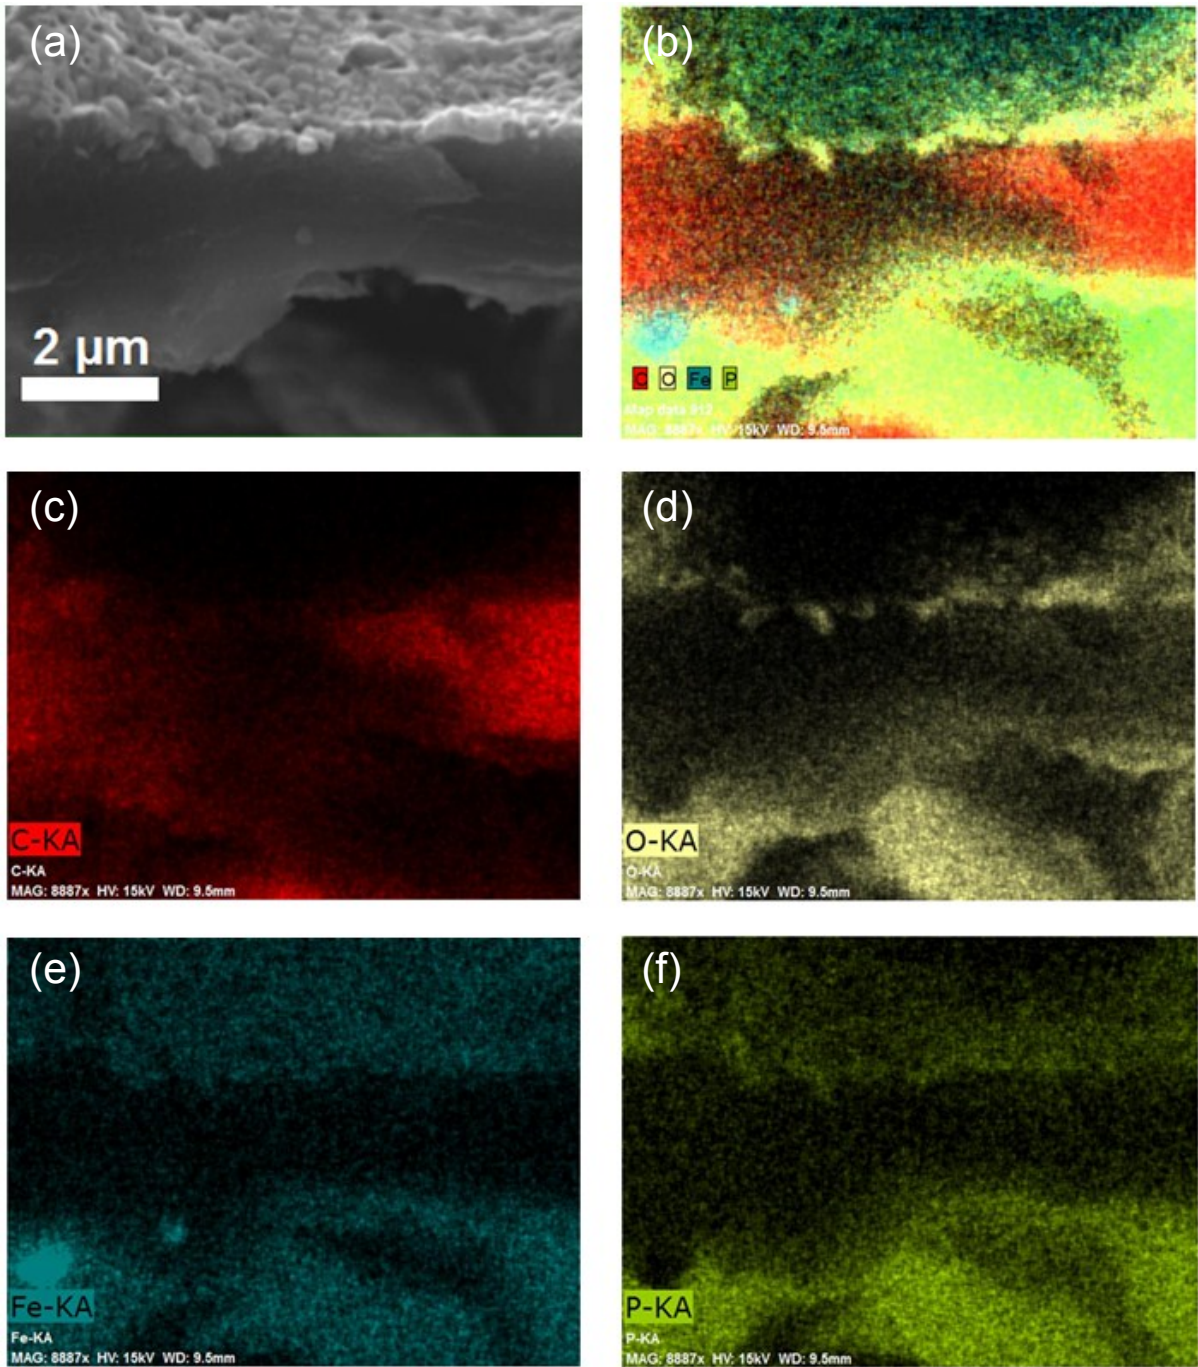

Figure S4: SEM energy-dispersive spectroscopy (EDS) characterization of LiFePO<sub>4</sub>@CP. (a) SEM image of the selected area for EDS mapping; (b) Integrated Fe-, P-, O-, and C-elemental mapping image; elemental mapping images of (c) carbon C, (d) oxygen O, (e) iron Fe, and (f) phosphorous P.

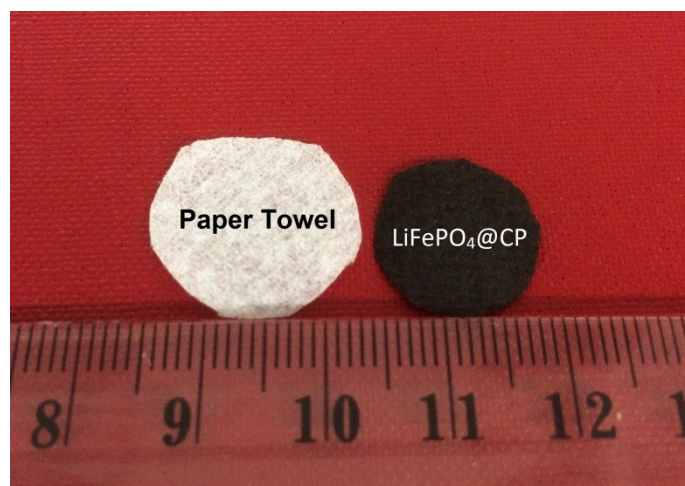

Figure S5: Digital photograph to visualize the shrinkage of the cellulose substrate (paper towel) to LiFePO<sub>4</sub>@C after carbonization.



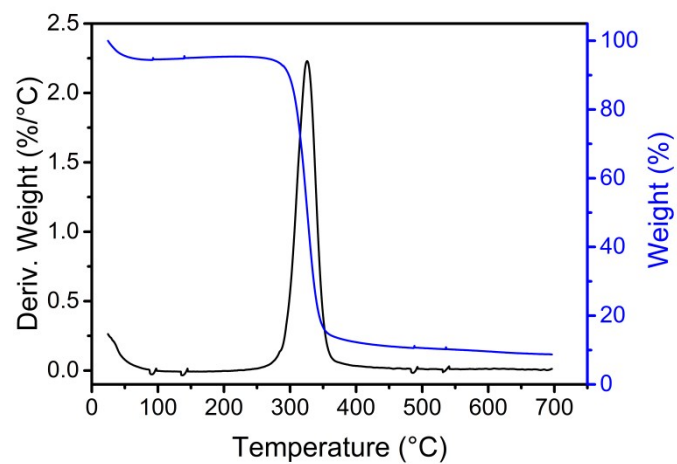

Figure S6: TGA/DTA analysis of PT carbonized in the temperature range from room temperature to 700 °C under nitrogen flow with a heating rate of 5 °C min<sup>-1</sup>

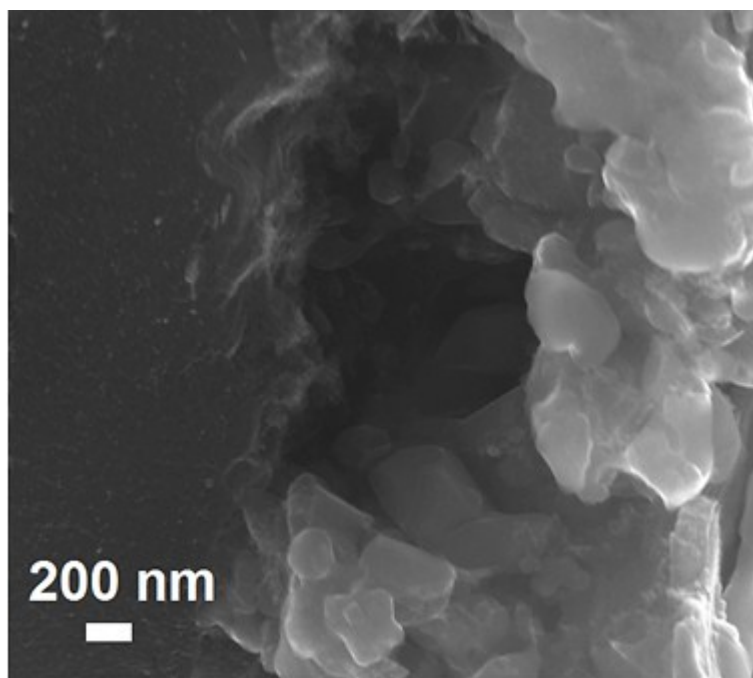

Figure S7: High magnification SEM of LiFePO<sub>4</sub>@CP showing a cavity inside the dense shell

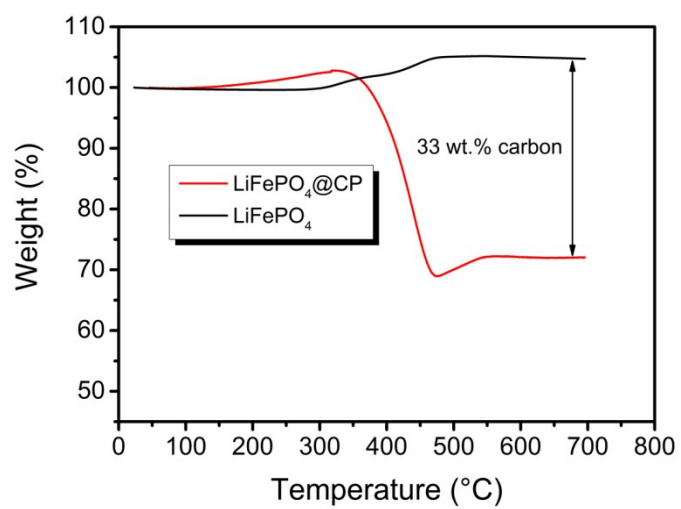

Figure S8: TGA curve of  $\text{LiFePO}_4@CP$  and carbon free  $\text{LiFePO}_4$  from room temperature to 700 °C in air

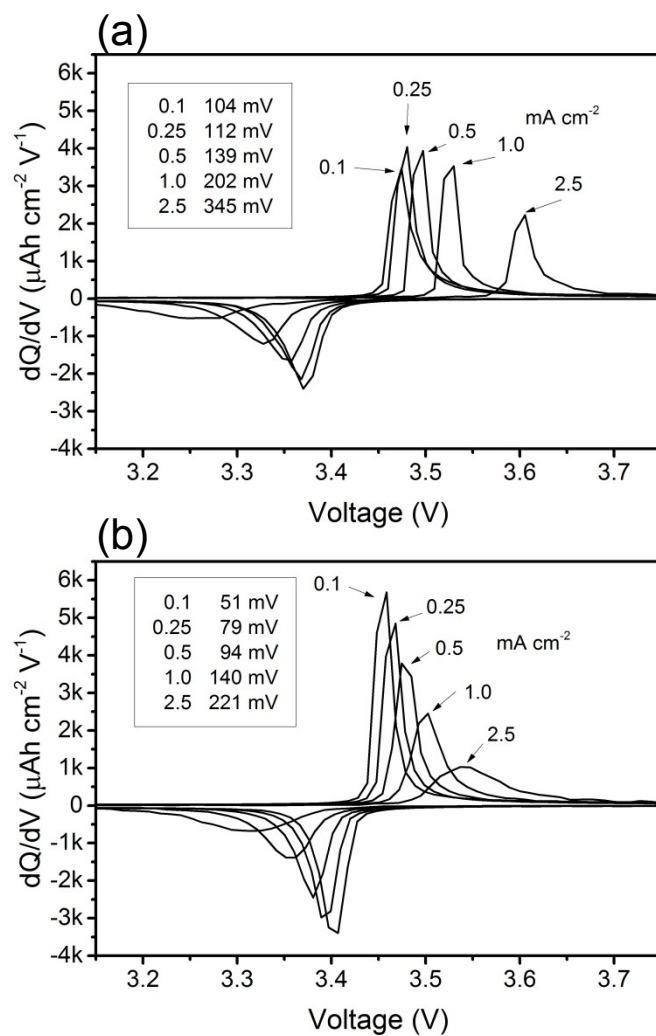

Figure S9: Corresponding differential capacity analysis of (a) step one and (b) step three of LiFePO<sub>4</sub>@CP (Insets: Overpotentials in mV for the current densities 0.1 to 2.5 mA cm<sup>-2</sup>)

*Preparation of LiFePO<sub>4</sub> cathode materials:* LiFePO<sub>4</sub> was prepared by mixing stoichiometric amounts of FeC<sub>2</sub>O<sub>4</sub>·2H<sub>2</sub>O, NH<sub>4</sub>H<sub>2</sub>PO<sub>4</sub> and Li<sub>2</sub>CO<sub>3</sub> (Sigma-Aldrich) *via* industrial-scale ball milling in deionized water for 6 h. Simultaneously, 5 wt.% sucrose was added to the suspension to encapsulate the precursor materials during spray drying and to serve as a carbon source in the subsequent carbothermal reduction. The solid content of the suspension was fixed at 20 wt.%. The untreated precursor mixture was spray-dried (Mini Spray Dryer B290, BÜCHI Labortechnik AG, Switzerland) with an inlet temperature of 170 °C and a feed rate of 15 ml min<sup>-1</sup>. The dried powder was then transferred into a ceramic crucible to thermally decompose in a tubular furnace at 350 °C for 5 h and sintered at 700 °C for 10 h under argon protection. The working electrodes of LiFePO<sub>4</sub>@Al for electrochemical testing were prepared by mixing 80 wt.% as-prepared LiFePO<sub>4</sub> with 10 wt.% carbon black and 10 wt.% poly(vinyl difluoride) (PVDF, Sigma-Aldrich) in N-Methyl-2-pyrrolidone (NMP, Sigma-Aldrich). The obtained dispersion was carefully pasted onto aluminium foil, dried in a vacuum at 80 °C for 12 h and pressed before cell assembly. The cell assembly was conducted as described in the experimental section.

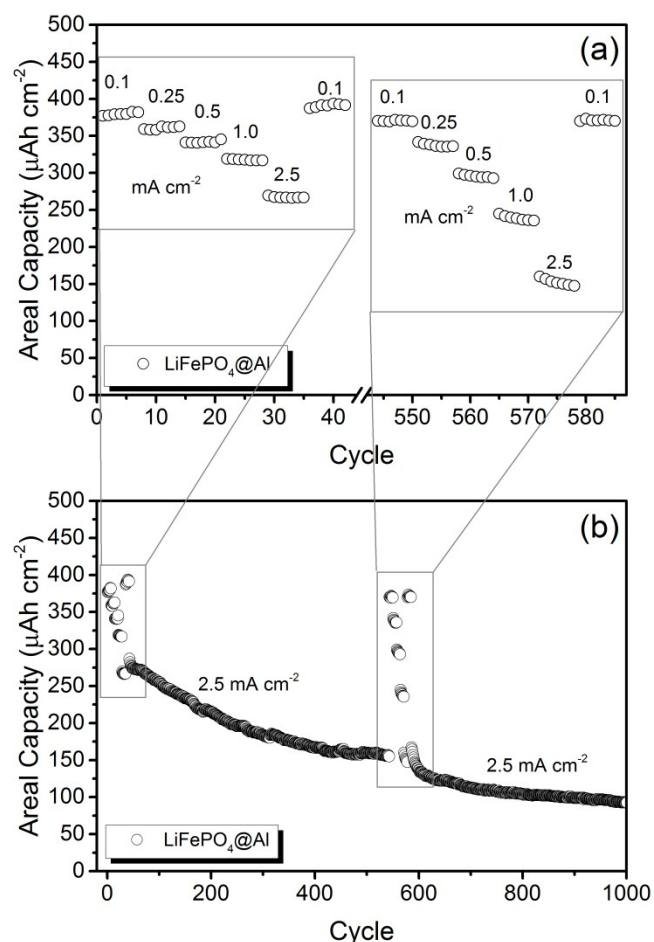

Figure S10: (a) Rate performance and (b) stability test sequence of a traditional LiFePO<sub>4</sub>@Al displayed in areal capacity. The active material mass load of all electrodes is around 2.8 mg cm<sup>-2</sup>.

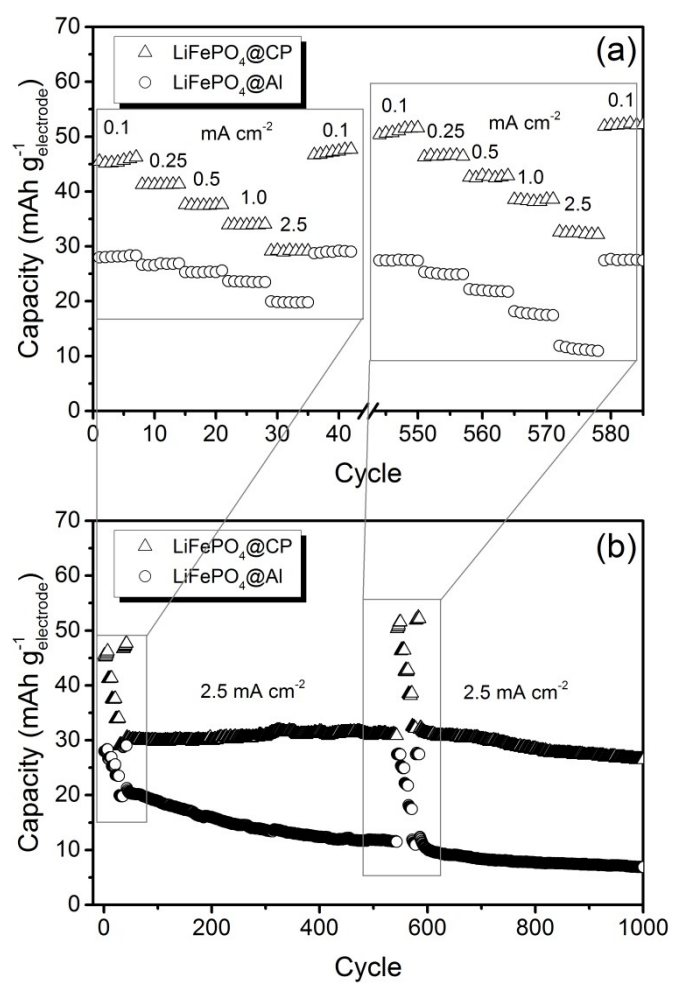

Figure S11: (a) Rate performance and (b) stability test sequence of LiFePO<sub>4</sub>@CP and a traditional LiFePO<sub>4</sub>@Al. The capacity is displayed in mAh per gram of electrode (weight including current collector, binder and additives). The active material mass load of all electrodes is around 2.8 mg cm<sup>-2</sup>.

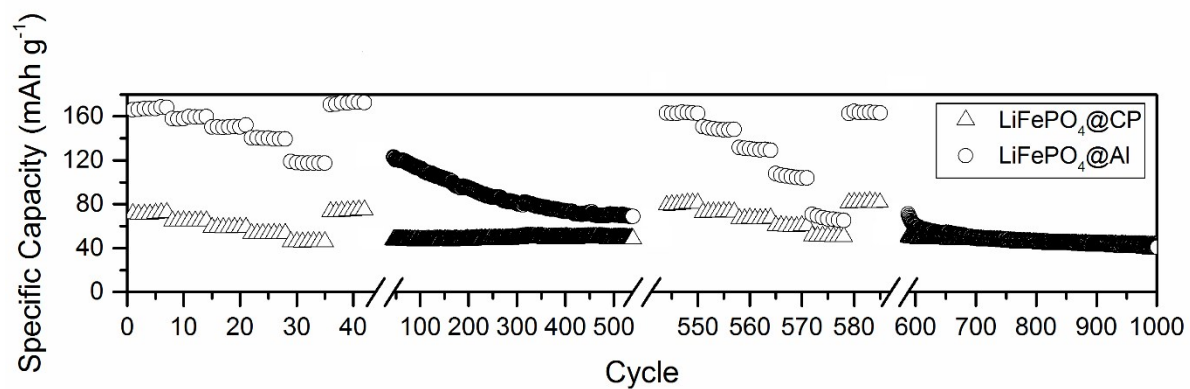

Figure S12: Rate performance and stability test sequence of LiFePO<sub>4</sub>@CP and a traditional LiFePO<sub>4</sub>@Al. The capacity is displayed in mAh per gram active material. The active material mass load of all electrodes is around 2.8 mg cm<sup>-2</sup>.

## References

- [1] <http://data.worldbank.org/data-catalog/commodity-price-data>, The World Bank Group, **2015**.
- [2] X. Ju, M. Bowden, E. E. Brown, X. Zhang, *Carbohydrate Polymers* **2015**, *123*, 476–481.
- [3] Q. Pang, L. Wang, H. Yang, L. Jia, X. Pan, C. Qiu, *RSC Advances* **2014**, *4*, 41212-41218.
- [4] A. P. Voronov, G. N. Babenko, V. M. Puzikov, A. N. Iurchenko, *Journal of Crystal Growth* **2013**, *374*, 49-52.
- [5] G. X. Wang, H. Liu, J. Liu, S. Qiao, G. M. Lu, P. Munroe, H. Ahn, *Advanced Materials* **2010**, *22*, 4944-4948.
- [6] B. Kang, G. Ceder, *Nature* **2009**, *458*, 190-193.
- [7] L. Yang, G. Liang, L. Wang, X. Zhi, X. Ou, *Journal of Alloys and Compounds* **2010**, *496*, 376-379.
